# Supplementary material
Source: Springer Nature journal article supplement (https://www.springermedizin.de/resource/supplementary/12885_2004_155_MOESM5_ESM.pdf/9469030)

25

p27<sup>KIP1</sup>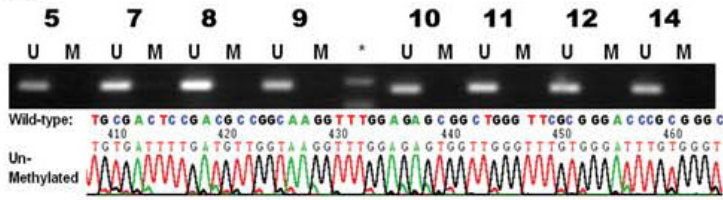

Methylated:

26

p57<sup>KIP2</sup>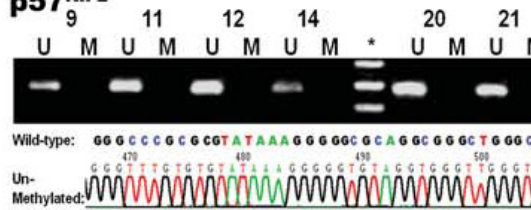

p73

27

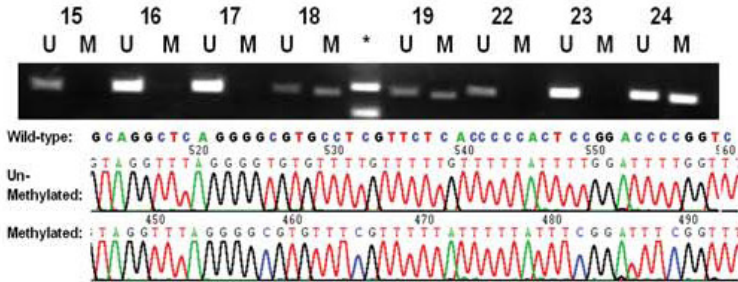

28

PTEN

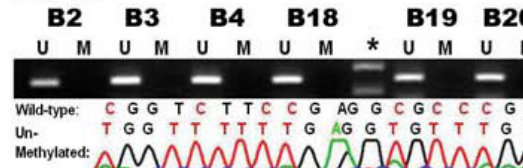

RASSF1A

29

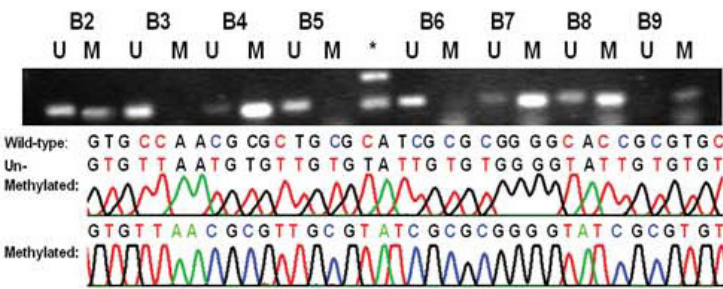

RASSF1C

30

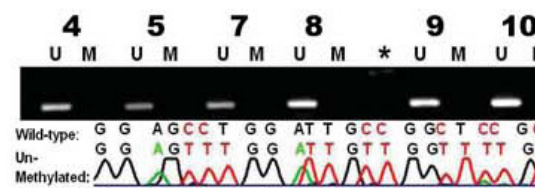

31

RB1

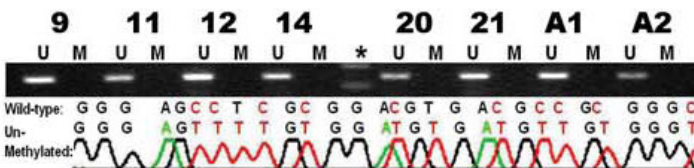

32

SURVIVIN

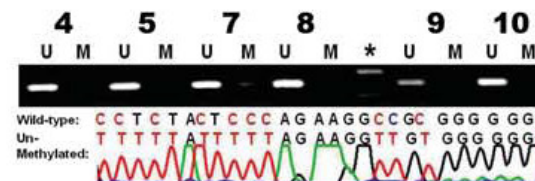

VHL

33

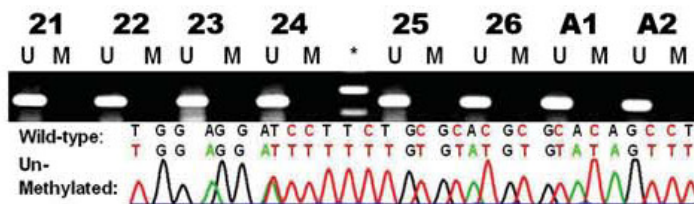

34

WT1

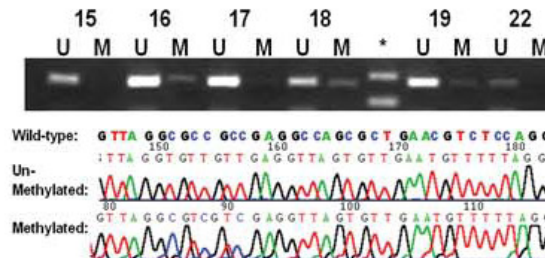

Supplement: MOESM5 [file 9469030]
